# Supplementary material for: Quantifying intuition: Bayesian approach to figures of merit in EXAFS analysis of magic size clusters
Source: Royal Society of Chemistry journal article supplement (doi:10.1039/d3nr05110b), 2024-01-01
Supplement: d3nr05110b1.pdf [file d3nr05110b1.pdf]

# Journal Name

## ARTICLE TYPE

Cite this: DOI: 00.0000/xxxxxxxxxx

## Electronic Supporting Information for "Quantifying Intuition: Bayesian Approach to Figures of Merit in EXAFS Analysis of Magic Size Clusters"

Lucy Haddad,<sup>a</sup> Diego Gianolio,<sup>b</sup> David J. Dunstan,<sup>a</sup> and Andrei Sapelkin<sup>a</sup>

Received Date

Accepted Date

DOI: 00.0000/xxxxxxxxxx

### 1 Covariance Matrix Calculation

For constructing correlation matrices of results, I indexed matrices by order of parameter reported in Larch.

For example if  $\Delta R$  was reported first and E0 was reported second,  $c_{11}$  of the correlation matrix would be  $\Delta R$ 's correlation with itself (i.e. 1),  $c_{12}$  ( $=c_{21}$ ) would be the correlation between  $\Delta R$  and E0.

Multiplying each element of correlation matrix by the errors of each parameter it's indexed by gives the elements of the parameter covariance matrix.

$$c_{ij} := \text{Corr}(X_i, X_j) = \frac{\text{Cov}(X_i, X_j)}{\sigma_{X_i} \sigma_{X_j}} \quad (1)$$

( $\sigma_{X_i} \sigma_{X_j} > 0$ )

### 2 Fit Results for Ge

#### 2.1 Model 1

Parameter correlations:

$$\text{Corr}_{model1} = \begin{pmatrix} 1 & 0.8939 & 0.0155 & 0.0952 \\ 0.8939 & 1 & 0.0016 & 0.0835 \\ 0.0155 & 0.0016 & 1 & 0.8929 \\ 0.0952 & 0.0835 & 0.8929 & 1 \end{pmatrix}$$

#### 2.2 Model 2

Parameter correlations:

| # FoM        | Value (Ge Model 1)  |
|--------------|---------------------|
| $\chi^2$     | 0.07853625          |
| $\chi_\mu^2$ | 0.00462340          |
| AIC          | -109.27529          |
| BIC          | -105.099743         |
| lnL          | 55.7087890          |
| # FoM        | Value (Ge Model 2)  |
| $\chi^2$     | 0.04449535          |
| $\chi_\mu^2$ | 0.00342623          |
| AIC          | -113.199414         |
| BIC          | -104.848311         |
| lnL          | 64.6744943          |
| # FoM        | Value (Ge Model 3a) |
| $\chi^2$     | 0.68206306          |
| $\chi_\mu^2$ | 0.04015282          |
| AIC          | -63.9112922         |
| BIC          | -59.7357408         |
| LnL          | 85.52859223         |
| # FoM        | Value (Ge Model 3b) |
| $\chi^2$     | 1.88762731          |
| $\chi_\mu^2$ | 0.15602040          |
| AIC          | -31.5397887         |
| BIC          | -23.5345901         |
| LnL          | 96.94572188         |

Table 1 Ge FoMs and Model.

<sup>a</sup> QMUL, Mile End Road, London E1 4NS UK; Tel: ; E-mail: xxxc@aaa.bbb.ccc

<sup>b</sup> Diamond Light Source, Diamond House Harwell Science & Innovation Campus, Didcot OX11 0DE, UK; Tel: ; E-mail: .

$\text{Corr}_{model2} =$

$$\begin{pmatrix} 1 & 0.7104 & 0.1260 & 0.9053 & 0.7655 & 0.1870 & -0.0173 & 0.1260 \\ 0.7104 & 1 & -0.1301 & 0.7293 & 0.4034 & 0.1620 & -0.2782 & -0.5941 \\ 0.1260 & -0.1301 & 1 & 0.1883 & 0.6647 & 0.8806 & 0.9803 & 0.8491 \\ 0.9053 & 0.7293 & 0.1883 & 1 & 0.6672 & 0.1720 & 0.0213 & 0.1883 \\ 0.7655 & 0.4034 & 0.6647 & 0.6672 & 1 & 0.6969 & 0.5849 & 0.4068 \\ 0.1870 & 0.1620 & 0.8806 & 0.1720 & 0.6969 & 1 & 0.8519 & 0.6440 \\ -0.0173 & -0.2782 & 0.9803 & 0.0213 & 0.5849 & 0.8519 & 1 & 0.9192 \\ -0.2012 & -0.5941 & 0.8491 & -0.2146 & 0.4068 & 0.6440 & 0.9192 & 1 \end{pmatrix}$$

| Parameter  | Value       | Error                       |
|------------|-------------|-----------------------------|
| $\Delta R$ | -0.00140688 | $\pm 0.00203474$            |
| E0         | 7.66897390  | $\pm 0.67658567$            |
| $S0^2$     | 0.89160567  | $\pm 0.03684971$            |
| $\sigma^2$ | 0.00249832  | $\pm 1.7471 \times 10^{-4}$ |

Table 2 Ge Model 1 parameter values errors.

| Parameter    | Value                   | Error            |
|--------------|-------------------------|------------------|
| $\Delta R_1$ | 0.16479676              | $\pm 0.03272449$ |
| $\Delta R_2$ | 0.10219475              | $\pm 0.01338508$ |
| $\Delta R_3$ | 0.00801148              | $\pm 0.01909186$ |
| E0           | 12.0817927              | $\pm 1.61900030$ |
| $S0^2$       | 0.79597733              | $\pm 0.11791880$ |
| $\sigma_1^2$ | 0.00626589              | $\pm 0.00402359$ |
| $\sigma_2^2$ | $9.7952 \times 10^{-4}$ | $\pm 0.00153078$ |
| $\sigma_3^2$ | 0.00108762              | $\pm 0.00118266$ |

Table 3 Ge Model 2 parameter values and errors.

### 2.3 Model 3a

Resulting fit values and their errors (Model 3a):

| Parameter  | Value       | Error                       |
|------------|-------------|-----------------------------|
| $\Delta R$ | -0.08425028 | $\pm 0.00145216$            |
| E0         | 6.38352343  | $\pm 0.48374622$            |
| $S0^2$     | 1.79700429  | $\pm 0.05292039$            |
| $\sigma^2$ | 0.00258436  | $\pm 1.2318 \times 10^{-4}$ |

Table 4 Ge Model 3a parameter values and errors.

Parameter correlations were:

$$Corr_{model3a} = \begin{pmatrix} 1 & 0.89 & 0.0774 & 0.0891 \\ 0.89 & 1 & -0.0014 & 0.0128 \\ 0.0774 & 0.0014 & 1 & 0.8896 \\ 0.0891 & 0.0128 & 0.8896 & 1 \end{pmatrix}$$

### 2.4 Model 3b

Parameter correlations were:

$$Corr_{model3b} = \begin{pmatrix} 1 & -0.7747 & 0.2099 & 0.9023 & 0.1110 & -0.0608 & -0.1709 & 0.0988 \\ -0.7747 & 1 & -0.1111 & -0.5297 & 0.3364 & 0.5303 & -0.2704 & 0.0140 \\ 0.2099 & -0.1111 & 1 & 0.2483 & 0.0471 & 0.0027 & -0.0336 & 0.3111 \\ 0.9023 & -0.5297 & 0.2483 & 1 & 0.1340 & -0.0011 & -0.1925 & 0.0986 \\ 0.1110 & 0.3364 & 0.0471 & 0.1340 & 1 & 0.9061 & -0.6083 & 0.2088 \\ -0.0608 & 0.5303 & 0.0027 & -0.0011 & 0.9061 & 1 & -0.8166 & 0.1770 \\ -0.1709 & -0.2704 & -0.00336 & -0.1925 & -0.6083 & -0.8166 & 1 & -0.1355 \\ 0.0988 & 0.0140 & 0.3111 & 0.0986 & 0.2088 & 0.1770 & -0.1355 & 1 \end{pmatrix}$$

## 3 PDF Models

## 4 MSC Fit Results

### 4.1 MSC 311

| Parameter    | Value       | Error                       |
|--------------|-------------|-----------------------------|
| $\Delta R_1$ | -0.07358922 | $\pm 0.00874724$            |
| $\Delta R_2$ | -0.24820470 | $\pm 0.00507315$            |
| $\Delta R_3$ | 0.17477143  | $\pm 0.06170117$            |
| E0           | 7.05653752  | $\pm 0.79498277$            |
| $S0^2$       | 1.28427500  | $\pm 0.07120701$            |
| $\sigma_1^2$ | 0.00425651  | $\pm 8.7860 \times 10^{-4}$ |
| $\sigma_2^2$ | 0.00108184  | $\pm 3.2113 \times 10^{-4}$ |
| $\sigma_3^2$ | 0.01399333  | $\pm 0.00793785$            |

Table 5 Ge Model 3b parameters and values.

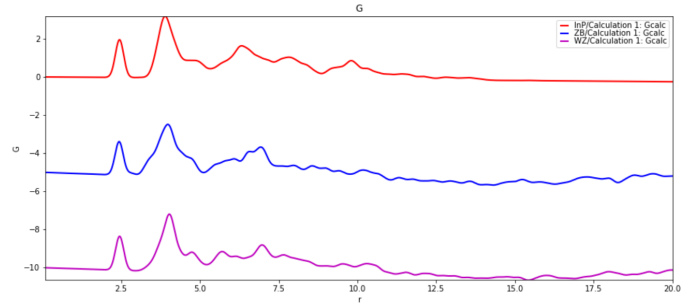

Fig. 1 Simulated xPDF spectra of 3 of the candidate models for the MSC (UFF).

| # FoM        | Value (zinc-blende UFF optimized)  |
|--------------|------------------------------------|
| $\chi^2$     | 13.137757528397                    |
| $\chi_\mu^2$ | 0.80584907859888                   |
| AIC          | 379.685071                         |
| BIC          | 401.340828                         |
| # FoM        | Value ( $\beta$ -Sn UFF optimized) |
| $\chi^2$     | 0.95043794157651                   |
| $\chi_\mu^2$ | 0.95043794157651                   |
| AIC          | 380.597594                         |
| BIC          | 402.253351                         |
| # FoM        | Value (InP)                        |
| $\chi^2$     | 13.93767986795                     |
| $\chi_\mu^2$ | 0.85491503821077                   |
| AIC          | 391.382381                         |
| BIC          | 413.038138                         |
| # FoM        | Value (wurtzite UFF optimized)     |
| $\chi^2$     | 29.967392960371                    |
| $\chi_\mu^2$ | 1.8381520554727                    |
| AIC          | 402.077951                         |
| BIC          | 423.733709                         |

Table 6 MSC 311 UFF optimized models FoMs and values.

### 4.2 MSC 322

| Parameter         | Value       | $\pm$ Error |
|-------------------|-------------|-------------|
| $\Delta R_1$      | 0.03282165  | 0.06585720  |
| $\Delta R_2$      | -0.13343322 | 0.05487476  |
| $\Delta R_3$      | 0.18911319  | 0.09005477  |
| $\Delta R_4$      | -0.13450523 | 0.01369651  |
| $\Delta R_5$      | -0.28647788 | 0.10385472  |
| $\Delta R_6$      | -0.02413652 | 0.00697081  |
| E0                | 5.87220860  | 1.20700151  |
| $S0^2$            | 1.49999995  | 0.17847886  |
| $\sigma_1^2$      | 0.00918721  | 0.00679341  |
| $\sigma_2^2$      | 0.00852422  | 0.00548349  |
| $\sigma_3^2$      | 0.01452069  | 0.01101530  |
| $\sigma_4^2$      | 0.00231760  | 0.00158804  |
| $\sigma_5^2$      | 0.00830576  | 0.01416707  |
| $\sigma_6^2$      | 0.00161413  | 7.58707e-4  |
| Cd-O 3rd Cumulant | -0.01941486 | 0.00586668  |

Table 10 InP MSC 311 parameter results from fit.

| Parameter         | Value       | $\pm$ Error |
|-------------------|-------------|-------------|
| $\Delta R_1$      | -0.36208142 | 0.23963249  |
| $\Delta R_2$      | 0.07287854  | 0.14333625  |
| $\Delta R_3$      | 0.50762678  | 0.34932255  |
| $\Delta R_4$      | -0.24955348 | 0.35414932  |
| $\Delta R_5$      | 0.21182778  | 0.10401378  |
| $\Delta R_6$      | 0.07725703  | 0.02016184  |
| E0                | 7.08420397  | 2.34319246  |
| $S0^2$            | 1.42978990  | 0.50228890  |
| $\sigma_1^2$      | 0.02915404  | 0.03711877  |
| $\sigma_2^2$      | 0.01330498  | 0.01405962  |
| $\sigma_3^2$      | 0.02243392  | 0.05272623  |
| $\sigma_4^2$      | 0.02615848  | 0.08296747  |
| $\sigma_5^2$      | 2.4237e-11  | 0.05548291  |
| $\sigma_6^2$      | 4.28522e-4  | 0.00548038  |
| Cd-O 3rd Cumulant | -5.21710e-4 | 9.83225e-4  |

Table 11 UFF Optimized wurtzite MSC 311 parameter results from fit.

| Parameter         | Value       | $\pm$ Error |
|-------------------|-------------|-------------|
| $\Delta R_1$      | -0.34994115 | 0.13702574  |
| $\Delta R_2$      | -0.06768343 | 0.32504253  |
| $\Delta R_3$      | -0.17602182 | 0.07240709  |
| $\Delta R_4$      | 0.11949714  | 0.07272283  |
| $\Delta R_5$      | 0.04062348  | 0.01474340  |
| $\Delta R_6$      | -0.04456645 | 0.00963823  |
| E0                | 2.84276927  | 1.08080816  |
| $S0^2$            | 0.76047743  | 0.08128971  |
| $\sigma_1^2$      | 0.01916003  | 0.01866999  |
| $\sigma_2^2$      | 0.02532326  | 0.05172049  |
| $\sigma_3^2$      | 0.01006357  | 0.00728044  |
| $\sigma_4^2$      | 0.01050630  | 0.00603681  |
| $\sigma_5^2$      | 2.55050e-4  | 0.00125294  |
| $\sigma_6^2$      | 0.00406757  | 0.00165866  |
| Cd-O 3rd Cumulant | 0.01214339  | 0.00209641  |

Table 12 DFT Optimized Zinc-Blende MSC 311 parameter results from fit.

| Parameter         | Value       | $\pm$ Error |
|-------------------|-------------|-------------|
| $\Delta R_1$      | 0.21697410  | 0.09682118  |
| $\Delta R_2$      | -0.06512601 | 0.06428268  |
| $\Delta R_3$      | 0.22007272  | 0.05145213  |
| $\Delta R_4$      | -0.31934560 | 0.07807775  |
| $\Delta R_5$      | 0.54021927  | 0.14498515  |
| $\Delta R_6$      | 0.13342227  | 0.01390976  |
| E0                | 8.14020385  | 2.50377827  |
| $S0^2$            | 1.50000000  | 8.68691925  |
| $\sigma_1^2$      | 0.01380318  | 0.01252344  |
| $\sigma_2^2$      | 0.01158087  | 0.00767517  |
| $\sigma_3^2$      | 2.91419e-8  | 0.11364470  |
| $\sigma_4^2$      | 0.06666964  | 0.01949219  |
| $\sigma_5^2$      | 0.03285543  | 0.03358842  |
| $\sigma_6^2$      | 8.02916e-4  | 0.00392128  |
| Cd-O 3rd Cumulant | -6.20498e-4 | 3.57972e-4  |

Table 13 DFT Optimized  $\beta$ -Sn MSC 311 parameter results from fit.

| Parameter         | Value       | $\pm$ Error |
|-------------------|-------------|-------------|
| $\Delta R_1$      | 0.02141792  | 0.18161926  |
| $\Delta R_2$      | -0.00165774 | 0.07476340  |
| $\Delta R_3$      | -0.43781025 | 0.20347274  |
| $\Delta R_4$      | -0.45685489 | 0.08612126  |
| $\Delta R_5$      | -0.02671040 | 0.01212220  |
| $\Delta R_6$      | 0.05492013  | 0.01026264  |
| E0                | 4.05417799  | 1.60404493  |
| $S0^2$            | 1.49999993  | 0.11845651  |
| $\sigma_1^2$      | 0.03146840  | 0.03024400  |
| $\sigma_2^2$      | 0.01339112  | 0.00880531  |
| $\sigma_3^2$      | 0.02538696  | 0.04047429  |
| $\sigma_4^2$      | 0.04556082  | 0.00988582  |
| $\sigma_5^2$      | 0.00220769  | 0.00204737  |
| $\sigma_6^2$      | 0.00105537  | 0.00157574  |
| Cd-O 3rd Cumulant | -0.01996019 | 0.01152446  |

Table 14 DFT Optimized wurtzite MSC 311 parameter results from fit.

| # FoM        | Value (zinc-blende UFF optimized)  |
|--------------|------------------------------------|
| $\chi^2$     | 15.926460990271                    |
| $\chi_\mu^2$ | 1.3300869375539                    |
| AIC          | 316.167274                         |
| BIC          | 335.590424                         |
| # FoM        | Value ( $\beta$ -Sn UFF optimized) |
| $\chi^2$     | 15.307879335878                    |
| $\chi_\mu^2$ | 1.2784265354834                    |
| AIC          | 312.148308                         |
| BIC          | 331.571458                         |
| # FoM        | Value (InP)                        |
| $\chi^2$     | 16.2250748348                      |
| $\chi_\mu^2$ | 1.3550254580591                    |
| AIC          | 311.527681                         |
| BIC          | 330.950831                         |
| # FoM        | Value (wurtzite UFF optimized)     |
| $\chi^2$     | 30.859903297829                    |
| $\chi_\mu^2$ | 2.5772426338591                    |
| AIC          | 329.687977                         |
| BIC          | 349.111127                         |

Table 15 MSC 322 UFF optimized models FoMs and values.

| Parameter         | Value       | $\pm$ Error |
|-------------------|-------------|-------------|
| $\Delta R_1$      | 0.26137530  | 0.16775917  |
| $\Delta R_2$      | -0.17593065 | 0.04296148  |
| $\Delta R_3$      | -0.06312106 | 0.06681595  |
| $\Delta R_4$      | 0.25080242  | 0.08385056  |
| $\Delta R_5$      | -0.02224874 | 0.01211012  |
| $\Delta R_6$      | -0.16729583 | 0.01387111  |
| E0                | 0.09173737  | 1.48742868  |
| $S0^2$            | 1.40568587  | 0.21924580  |
| $\sigma_1^2$      | 0.01718823  | 0.02603750  |
| $\sigma_2^2$      | 0.00679538  | 0.00472036  |
| $\sigma_3^2$      | 0.00779194  | 0.00732691  |
| $\sigma_4^2$      | 0.01652390  | 0.00780238  |
| $\sigma_5^2$      | 2.8183e-12  | 0.00136431  |
| $\sigma_6^2$      | 0.00125238  | 0.00230185  |
| Cd-O 3rd Cumulant | 0.01231496  | 0.00333574  |

Table 19 InP MSC 322 parameter results from fit.

| Parameter         | Value       | $\pm$ Error |
|-------------------|-------------|-------------|
| $\Delta R_1$      | 0.12798502  | 0.07550860  |
| $\Delta R_2$      | 0.19276246  | 0.14065870  |
| $\Delta R_3$      | 0.29993629  | 0.20369988  |
| $\Delta R_4$      | 0.43416447  | 0.22987701  |
| $\Delta R_5$      | 0.19146239  | 0.14543783  |
| $\Delta R_6$      | 0.05588295  | 0.02300390  |
| E0                | 5.17380861  | 3.36479509  |
| $S0^2$            | 1.38137412  | 0.58754007  |
| $\sigma_1^2$      | 0.00606287  | 0.00636685  |
| $\sigma_2^2$      | 0.00717252  | 0.01145102  |
| $\sigma_3^2$      | 0.01106489  | 0.02431202  |
| $\sigma_4^2$      | 0.01353443  | 0.02885406  |
| $\sigma_5^2$      | 2.2545e-10  | 0.02020385  |
| $\sigma_6^2$      | 1.42868e-4  | 0.00647707  |
| Cd-O 3rd Cumulant | -4.28971e-4 | 0.00166953  |

Table 20 UFF Optimized wurtzite MSC 322 parameter results from fit.

| Parameter         | Value       | $\pm$ Error |
|-------------------|-------------|-------------|
| $\Delta R_1$      | 0.36252966  | 0.07083651  |
| $\Delta R_2$      | 0.15025876  | 0.05150959  |
| $\Delta R_3$      | 0.30511885  | 0.22963269  |
| $\Delta R_4$      | -0.07138511 | 0.16908217  |
| $\Delta R_5$      | -0.13002954 | 0.02247162  |
| $\Delta R_6$      | -0.00833200 | 0.01334105  |
| E0                | 1.53702247  | 1.61381336  |
| $S0^2$            | 0.67968552  | 0.20150179  |
| $\sigma_1^2$      | 0.00347392  | 0.00803017  |
| $\sigma_2^2$      | 0.00271259  | 0.00564498  |
| $\sigma_3^2$      | 0.01204499  | 0.02686456  |
| $\sigma_4^2$      | 0.00689435  | 0.00982757  |
| $\sigma_5^2$      | 1.5590e-11  | 0.28406968  |
| $\sigma_6^2$      | 0.00135599  | 0.00284600  |
| Cd-O 3rd Cumulant | 0.00239180  | 0.00318068  |

Table 21 DFT Optimized Zinc-Blende MSC 322 parameter results from fit.

| Parameter         | Value       | $\pm$ Error |
|-------------------|-------------|-------------|
| $\Delta R_1$      | 0.04143835  | 0.04388104  |
| $\Delta R_2$      | 0.38297088  | 0.14661145  |
| $\Delta R_3$      | 0.45670560  | 0.07737136  |
| $\Delta R_4$      | -0.52892596 | 0.09638376  |
| $\Delta R_5$      | 0.11306472  | 0.01080273  |
| $\Delta R_6$      | -0.22183722 | 0.01238124  |
| E0                | 0.21052467  | 1.39568464  |
| $S0^2$            | 1.45555711  | 0.20491087  |
| $\sigma_1^2$      | 0.01088980  | 0.00476725  |
| $\sigma_2^2$      | 0.01780873  | 0.02049128  |
| $\sigma_3^2$      | 0.01692651  | 0.00712260  |
| $\sigma_4^2$      | 0.01796559  | 0.01847393  |
| $\sigma_5^2$      | 2.8765e-12  | 9.04096e-4  |
| $\sigma_6^2$      | 0.00131603  | 0.00199730  |
| Cd-O 3rd Cumulant | 0.01186675  | 0.00304264  |

Table 22 DFT Optimized  $\beta$ -Sn MSC 322 parameter results from fit.

| Parameter         | Value       | $\pm$ Error |
|-------------------|-------------|-------------|
| $\Delta R_1$      | 0.11484025  | 0.05265343  |
| $\Delta R_2$      | -0.18173499 | 0.06074060  |
| $\Delta R_3$      | -0.15420714 | 0.04215927  |
| $\Delta R_4$      | -0.58619141 | 0.09774641  |
| $\Delta R_5$      | 0.06046623  | 0.01270421  |
| $\Delta R_6$      | -0.07166987 | 0.01444723  |
| E0                | 2.11658729  | 2.02049453  |
| $S0^2$            | 1.49999997  | 0.10647122  |
| $\sigma_1^2$      | 0.00969107  | 0.00522226  |
| $\sigma_2^2$      | 0.01522373  | 0.00791888  |
| $\sigma_3^2$      | 0.00833431  | 0.00391406  |
| $\sigma_4^2$      | 0.05075435  | 0.01298503  |
| $\sigma_5^2$      | 5.7362e-12  | 7.72006e-4  |
| $\sigma_6^2$      | 0.00105040  | 0.00213648  |
| Cd-O 3rd Cumulant | -0.03277052 | 0.01242642  |

Table 23 DFT Optimized wurtzite MSC 322 parameter results from fit.
